# Supplementary material for: Optimal parameters of random forest for land cover classification with suitable data type and dataset on Google Earth Engine
Source: Frontiers journal article supplement (doi:10.3389/feart.2023.1188093), 2023-10-23
Supplement: Data_Sheet_1.zip [file Data_Sheet_1.zip]

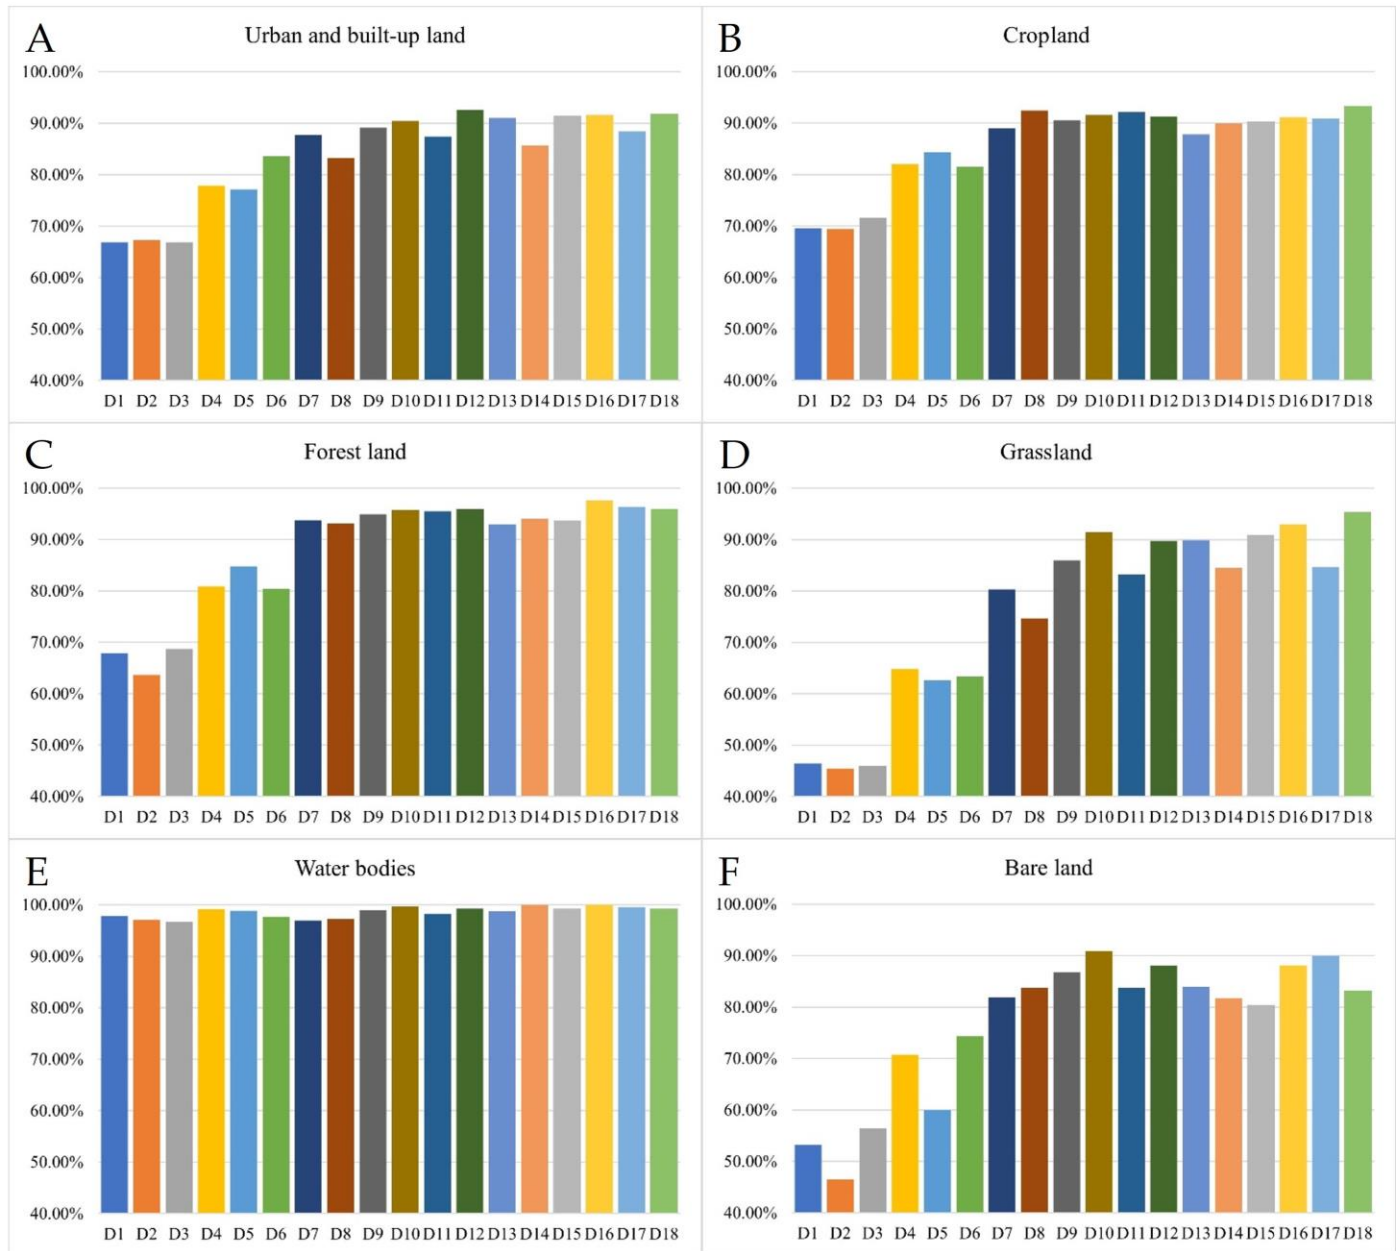

**Appendix S2.** User's accuracy (UA) of each LC type in Hefei City: (A) Urban and built-up land; (B) Cropland; (C) Forest land; (D) Grassland; (E) Water bodies; and (F) Bare land.
